# Supplementary material for: Effects of Palm Oil Deodorizer Distillate on the Ruminal Environment of Sheep
Source: MDPI journal article supplement (doi:10.3390/ani14091269), 2024-04-24
Supplement: s1 [file s1]

# Effects of Palm Oil Deodorizer Distillate on the Ruminal Environment of Sheep

D. A. das Graças<sup>a,1</sup>, E. de Moraes<sup>b</sup>, A. C. Sodré Lima<sup>c</sup>, S. M. de Souza<sup>d</sup>, L. F. Sousa<sup>e</sup>, D. C. Franco<sup>f</sup>, A. L. da Costa da Silva<sup>a</sup>, A. G. Maciel e Silva<sup>d</sup>

<sup>a</sup> *Laboratório de Genômica e Bioinformática, Universidade Federal do Pará, Instituto de Ciências Biológicas, Centro de Genômica e Biologia de Sistemas, Belém, Pará, Brasil.*

<sup>b</sup> *Instituto Federal de Ciência e Tecnologia do Pará, Castanhal, Pará, Brazil.*

<sup>c</sup> *Instituto Federal de Ciência e Tecnologia do Amapá, Campus Porto Grande, Macapá, AP, Brazil.*

<sup>d</sup> *Universidade Federal do Pará, Instituto de Medicina Veterinária, Castanhal, Pará, Brazil.*

<sup>e</sup> *Universidade Federal do Tocantins, Campus de Araguaína, Escola de Medicina Veterinária e Zootecnia.*

<sup>f</sup> *Universidade de São Paulo, Instituto Oceanográfico, Laboratório de Ecologia Microbiana, São Paulo, Brazil.*

<sup>1</sup> *Present address: Laboratório de Genômica e Bioinformática, Universidade Federal do Pará, Instituto de Ciências Biológicas, Centro de Genômica e Biologia de Sistemas, Belém, Pará, Brazil*

Corresponding author: Diego Assis. Email: [diego.a87@gmail.com](mailto:diego.a87@gmail.com)

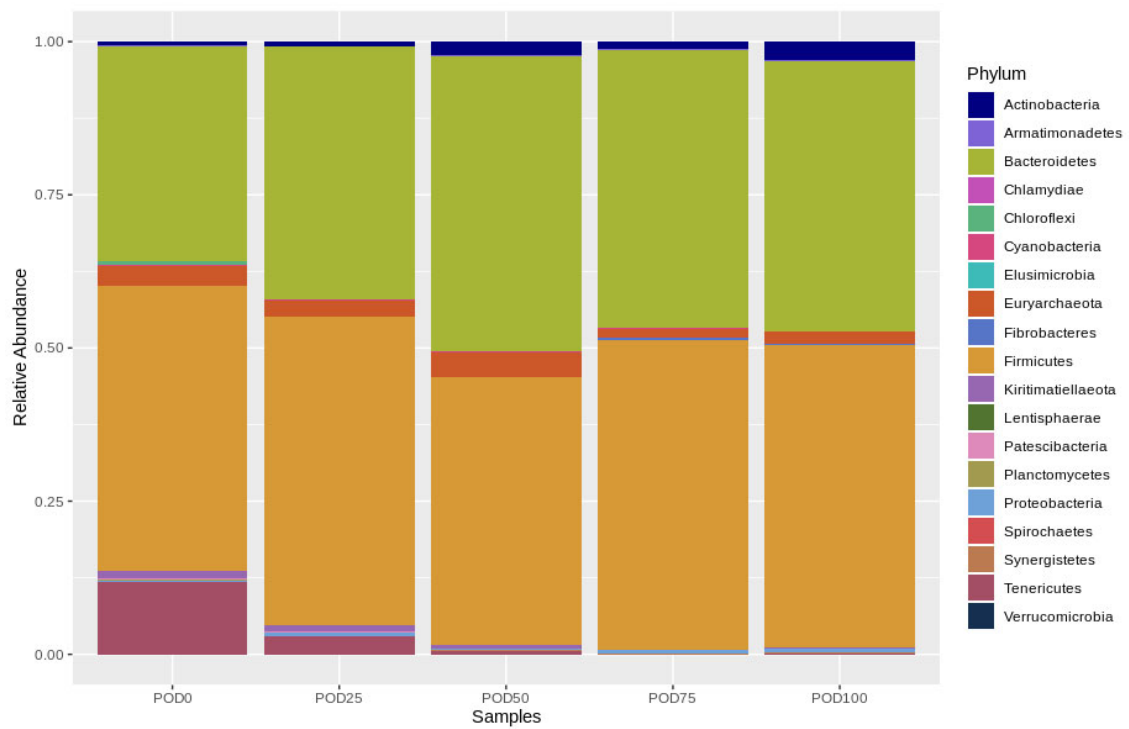

Supplementary Figure S1. Taxonomic diversity of the five samples. POD0, POD25, POD50, POD75 and POD100 correspond respectively to the inclusion of 0.0, 25.0, 50.0 75.0 and 100.0 g of POD per kg of DM
