# Supplementary material for: Effects of Palm Oil Deodorizer Distillate on the Ruminal Environment of Sheep
Source: MDPI journal article supplement (doi:10.3390/ani14091269), 2024-04-24
Supplement: s1 [file s1]

# Effects of Palm Oil Deodorizer Distillate on the Ruminal Environment of Sheep

D. A. das Graças<sup>a,1</sup>, E. de Moraes<sup>b</sup>, A. C. Sodré Lima<sup>c</sup>, S. M. de Souza<sup>d</sup>, L. F. Sousa<sup>e</sup>, D. C. Franco<sup>f</sup>,  
A. L. da Costa da Silva<sup>a</sup>, A. G. Maciel e Silva<sup>d</sup>

<sup>a</sup>*Laboratório de Genômica e Bioinformática, Universidade Federal do Pará, Instituto de Ciências Biológicas, Centro de Genômica e Biologia de Sistemas, Belém, Pará, Brasil.*

<sup>b</sup>*Instituto Federal de Ciência e Tecnologia do Pará, Castanhal, Pará, Brazil.*

<sup>c</sup>*Instituto Federal de Ciência e Tecnologia do Amapá, Campus Porto Grande, Macapá, AP, Brazil.*

<sup>d</sup>*Universidade Federal do Pará, Instituto de Medicina Veterinária, Castanhal, Pará, Brazil.*

<sup>e</sup>*Universidade Federal do Tocantins, Campus de Araguaína, Escola de Medicina Veterinária e Zootecnia.*

<sup>f</sup>*Universidade de São Paulo, Instituto Oceanográfico, Laboratório de Ecologia Microbiana, São Paulo, Brazil.*

<sup>1</sup>*Present address: Laboratório de Genômica e Bioinformática, Universidade Federal do Pará, Instituto de Ciências Biológicas, Centro de Genômica e Biologia de Sistemas, Belém, Pará, Brazil*

Corresponding author: Diego Assis. Email: [diego.a87@gmail.com](mailto:diego.a87@gmail.com)

Supplementary Table S1 - Ingredients and chemical compositions (g kg<sup>-1</sup> of DM) of the experimental diets.

| Experimental diets.                         |        | POD levels (g kg <sup>-1</sup> of DM) |        |       |       |        |
|---------------------------------------------|--------|---------------------------------------|--------|-------|-------|--------|
| Ingredients                                 |        | POD0                                  | POD25  | POD50 | POD75 | POD100 |
| Elephant grass silage                       |        | 500.0                                 | 500.0  | 500.0 | 500.0 | 500.0  |
| POD                                         |        | 0.0                                   | 25.0   | 50.0  | 75.0  | 100.0  |
| Corn                                        |        | 355.0                                 | 320.0  | 290.0 | 260.0 | 225.0  |
| Soybean meal                                |        | 125.0                                 | 135.0  | 140.0 | 145.0 | 155.0  |
| Mineral and vitamin supplement <sup>1</sup> |        | 20.0                                  | 20.0   | 20.0  | 20.0  | 20.0   |
| Chemical composition                        | Silage |                                       |        |       |       |        |
| Dry matter                                  | 200.8  | 523.5                                 | 5526.6 | 529.6 | 532.6 | 535.7  |
| Organic matter                              | 957.4  | 943.9                                 | 943.6  | 943.6 | 943.6 | 943.3  |
| Crude protein                               | 68.5   | 124.1                                 | 126.0  | 126.1 | 126.1 | 128.0  |
| Ether extract                               | 38.3   | 35.8                                  | 59.6   | 83.5  | 107.4 | 131.2  |
| Ash                                         | 42.6   | 35.2                                  | 35.5   | 35.6  | 35.7  | 36.0   |
| NDFap <sup>2</sup>                          | 778.5  | 449.6                                 | 446.6  | 443.7 | 440.7 | 437.8  |
| ADF <sup>3</sup>                            | 489.9  | 269.6                                 | 269.1  | 268.3 | 267.6 | 267.1  |
| Lignin <sup>4</sup>                         | 77.7   | -                                     | -      | -     | -     | -      |

<sup>1</sup>Contained per kg: 140 g of Ca, 65 g of P, 10 g of Mg, 760 mg of F, 12 g of S, 1,000 mg of Fe, 3,000 mg of Mn, 60 mg of I, 80 mg of Co and 130 g of Na; POD0, POD25, POD50, POD75 and POD100 correspond respectively to the inclusion of 0.0, 25.0, 50.0 75.0 and 100.0 g of POD per kg of DM; <sup>2</sup>Neutral detergent fiber corrected for ash and protein; <sup>3</sup> Acid detergent fiber corrected for ash and protein; <sup>4</sup>Lignin in sulfuric acid.

Supplementary Table S2 - Fatty acid profile of POD (g kg<sup>-1</sup>).

|                          |        |
|--------------------------|--------|
| Lauric acid (C12:0)      | 20.0   |
| Myristic acid (C14:0)    | 15.0   |
| Palmitic acid (C16:0)    | 415.0  |
| Palmitoleic acid (C16:1) | -      |
| Stearic acid (C18:0)     | 50.0   |
| Oleic acid (C18:1)       | 400.0  |
| Linoleic acid (C18:2)    | 100.0  |
| Linolenic acid (C18:3)   | -      |
| Arachidonic acid (C20:0) | -      |
| Total fatty acids        | >900.0 |
| Saturated fatty acids    | 504.0  |
| Unsaturated fatty acids  | 496.0  |

Supplementary Table S3 - Regression equations of ruminal degradation parameters of dry matter (DM), organic matter (OM), crude protein and the neutral detergent fiber (NDF) of Elephant grass silage (*Pennisetum purpureum*) in diets with POD inclusion.

| Dry Matter               |                                               |     |                |       |
|--------------------------|-----------------------------------------------|-----|----------------|-------|
|                          | Equations                                     | PI  | R <sup>2</sup> | ED    |
| POD0                     | PD = 10.87+62.41(1-e <sup>0.0111 × t</sup> )  | aAB | 97.4           | 33.15 |
| POD25                    | PD = 9.86+65.77(1-e <sup>0.01142 × t</sup> )  | aA  | 98.3           | 33.77 |
| POD50                    | PD = 10.93+60.34(1-e <sup>0.00986 × t</sup> ) | aC  | 97.1           | 30.86 |
| POD75                    | PD = 9.96+59.65(1-e <sup>0.01169 × t</sup> )  | aB  | 98.8           | 31.96 |
| POD100                   | PD = 10.24+51.47(1-e <sup>0.01114 × t</sup> ) | aD  | 97.6           | 28.65 |
| Organic Matter           |                                               |     |                |       |
| POD0                     | PD = 10.70+75.37(1-e <sup>0.008 × t</sup> )   | aAB | 97.10          | 32.23 |
| POD25                    | PD = 9.63+77.08(1-e <sup>0.00862 × t</sup> )  | aA  | 97.50          | 32.85 |
| POD50                    | PD = 10.19+69.25(1-e <sup>0.0075 × t</sup> )  | aC  | 96.30          | 29.07 |
| POD75                    | PD = 9.89+70.29(1-e <sup>0.00866 × t</sup> )  | aB  | 98.10          | 31.13 |
| POD100                   | PD = 9.82+54.26(1-e <sup>0.0099 × t</sup> )   | aC  | 94.40          | 27.79 |
| Crude Protein            |                                               |     |                |       |
| POD0                     | PD = 45.84+30.64(1-e <sup>0.04052 × t</sup> ) | aA  | 84.70          | 66.36 |
| POD25                    | PD = 44.32+30.75(1-e <sup>0.0527 × t</sup> )  | aA  | 88.60          | 66.61 |
| POD50                    | PD = 43.42+26.85(1-e <sup>0.08043 × t</sup> ) | cC  | 86.50          | 64.92 |
| POD75                    | PD = 40.22+39.41(1-e <sup>0.07063 × t</sup> ) | aA  | 83.60          | 70.94 |
| POD100                   | PD = 36.66+38.21(1-e <sup>0.0708 × t</sup> )  | bB  | 89.00          | 66.46 |
| Neutral Detergente Fiber |                                               |     |                |       |
| POD0                     | PD = 6.18+70.00(1-e <sup>0.00551 × t</sup> )  | aA  | 94.90          | 21.29 |
| POD25                    | PD = 5.64+70.13(1-e <sup>0.00597 × t</sup> )  | aA  | 94.60          | 21.76 |
| POD50                    | PD = 4.48+68.22(1-e <sup>0.00519 × t</sup> )  | aC  | 92.70          | 18.54 |
| POD75                    | PD = 5.71+69.38(1-e <sup>0.00524 × t</sup> )  | aB  | 94.50          | 20.11 |
| POD100                   | PD = 5.96+75.27(1-e <sup>0.00402 × t</sup> )  | aC  | 90.80          | 18.55 |

POD0, POD25, POD50, POD75 and POD100 correspond respectively to the inclusion of 0.0, 25.0, 50.0 75.0 and 100.0 g of POD per kg of DM; PD = a + b × (1 - e<sup>-ct</sup>). PD, potential degradability at time t (hours) of rumen incubation; a, rapidly soluble fraction; b, potentially degradable fraction; c, rate of degradation of fraction b; t, incubation time (hours). P - Parallelism; I - Identity; Equations following by equal lowercase letters in the column are parallel by the curve parallelism test; Equations following by equal capital letters in the column are identical by the curve identity test 5% error probability. ED, effective degradability.

Supplementary Table S4 - Ruminal parameters of sheep fed experimental diet.

| Parameters                                             | POD levels (g kg <sup>-1</sup> of DM) |                    |                   |                   |                   | SEM        | P-value |        |       |
|--------------------------------------------------------|---------------------------------------|--------------------|-------------------|-------------------|-------------------|------------|---------|--------|-------|
|                                                        | 0                                     | 25                 | 50                | 75                | 100               |            | D       | T      | D × T |
| <sup>1</sup> NH <sub>3</sub> -N (mg dL <sup>-1</sup> ) | 15.88                                 | 12.39              | 14.49             | 14.26             | 14.30             | 0.52       | 0.689   | <0.001 | 0.465 |
| <sup>2</sup> pH                                        | 6.68 <sup>b</sup>                     | 6.76 <sup>b</sup>  | 6.67 <sup>b</sup> | 7.01 <sup>1</sup> | 6.98 <sup>a</sup> | 0.03       | <0.001  | 0.049  | 0.512 |
| <sup>3</sup> MBR (min)                                 | 3.31 <sup>c</sup>                     | 3.77 <sup>b</sup>  | 4.11 <sup>b</sup> | 4.11 <sup>b</sup> | 4.62 <sup>a</sup> | 0.08       | <0.001  | <0.001 | 0.616 |
| Protozoa (× 10 <sup>5</sup> /mL)                       | 12.58 <sup>a</sup>                    | 12.25 <sup>a</sup> | 2.87 <sup>b</sup> | 4.87 <sup>b</sup> | 3.5 <sup>b</sup>  | 132,313.73 | <0.001  | -      | -     |

NH<sub>3</sub>-N - ammonia nitrogen; MBR, methylene blue reduction time; D - Diet; T time; D × T - Diet × time interaction; SEM, standard error of the mean, Equal letters do not differ by the SNK test.
